# Supplementary material for: An unprecedented vanadoniobate cluster with ‘trans-vanadium’ bicapped Keggin-type {VNb12O40(VO)2}
Source: Royal Society of Chemistry journal article supplement (doi:10.1039/c1cc12329g), 2011-01-01
Supplement: c1cc12329g.pdf [file c1cc12329g.pdf]

# An unprecedented vanadoniobate cluster with 'trans-vanadium' bicapped Keggin-type $\{VNb_{12}O_{40}(VO)_2\}$

Guiling Guo, Yanqing Xu\*, Jie Cao and Changwen Hu\*

*Department of Chemistry, School of Science, and Key Laboratory of Cluster Science, Ministry of Education of China, Beijing Institute of Technology, Beijing 100081, P. R. China*

## Materials

All reagents except  $K_7HNb_6O_{19} \cdot 13H_2O$ <sup>1</sup> were purchased from commercial sources and used without further purification. IR spectra were recorded on a Nicolet 170SXFT/IR spectrometer using KBr pellets in the range of 4000-400 $cm^{-1}$ . Powder X-ray Diffraction (PXRD) was performed on SHIMADZU XRD-6000 X-ray diffractometer equipped with graphite monochromatized Cu K $\alpha$  radiation ( $\lambda = 0.154056$  nm). TGA was performed on a TGA Q50 instrument under nitrogen atmosphere with a heating rate of 10°C/min. X-ray photoelectron spectrum (XPS) analysis were performed on a VG Escalabmkll spectrometer (UK) with a Al K $\alpha$  ( $h\nu = 1486.7$ eV) achromatic X-ray source. The UV spectra were obtained on a TU-1901 spectrophotometer in the range 190-400nm. The Visible spectrum of **1a** was carried out on UV-3600 spectrophotometer in the range of 400-1000nm.

## Syntheses

After further investigation on the experimental conditions, it was found that the organic amine used in the reaction play a key role in the formation of **1a** and **1b**. We tried to replace en with 1,2-dap and 1,3-dap for **1a** and substitute en/2,2'-bipy with 1,2-dap/2,2'-bipy, 1,3-dap/2,2'-bipy, en/1,10-phen, 1,2-dap /1,10-phen and 1,3-dap/1,10-phen (dap=diaminopropane, 1,10-phen = 1,10-phenanthroline) for **1b** under the same conditions, but no isostructural compounds were obtained in both cases.

## X-ray crystallography

Crystal data for compounds **1a-1b** were collected at 296(2)K on Bruker APEX-II CCD detector with graphite monochromatic Mo K $\alpha$  radiation ( $\lambda=0.71073$ Å). Both structures were solved by direct methods and refined by full-matrix least-squares on  $F^2$  using the SHELXTL-97 program.<sup>2-3</sup> Part of active hydrogen atoms in compound **1a** are not picked out in the refinement for the poor crystal quality, as are O46,O47,O48, O49, O53, O57, O60, O54, O55, O56, O59, O55',O59', O62, N18, N19, N19'. In compound **1b**, the H atoms attached to carbon and nitrogen atoms are placed in calculated positions and are refined with a riding model. Other active hydrogen atoms of water molecule are not incorporated in the refinement for the weak diffraction intensity.  $\{Cu_6(en)_2\}^{2+}$  fragment in compound **1a** is in disorder. Cu6, N19, N19', C17, C18, N17 have the occupancy of 0.5. Cu6 and its symmetric generated atoms of Cu6A(symmetry code: A, -x,y,1/2-z) can't concurrence. When Cu6 is present, its two en molecules are N19-C19-C19A-N19'A and N17-C18-C17-N18, respectively; The other case is that Cu6A is present, its corresponding en molecules are N19A-C19A-C19-N19' and N17A-C18A-C17A-N18, respectively. The crystal data and structure refinement for two compounds were summarized in Table S2. Selected bond lengths (Å) and angles (°) were listed in Table S3.

**Table S1.** BVS results for compounds **1a-1b**.

|                    | V1   | V2   | V3   |
|--------------------|------|------|------|
| Compound <b>1a</b> | 5.24 | 4.26 | 4.35 |
| Compound <b>1b</b> | 5.64 | 5.22 | 5.08 |

**Table S2.** Crystallographic Data for Compounds **1a-1b**.

| Compounds                                           | <b>1a</b>                                                                                                          | <b>1b</b>                                                                                                         |
|-----------------------------------------------------|--------------------------------------------------------------------------------------------------------------------|-------------------------------------------------------------------------------------------------------------------|
| Formula                                             | C <sub>22</sub> H <sub>124</sub> N <sub>22</sub> Cu <sub>5.5</sub> Nb <sub>12</sub> V <sub>3</sub> O <sub>60</sub> | C <sub>34</sub> H <sub>90</sub> N <sub>18</sub> Cu <sub>4.5</sub> Nb <sub>12</sub> V <sub>3</sub> O <sub>51</sub> |
| <i>M<sub>r</sub></i>                                | 3274.64                                                                                                            | 3120.91                                                                                                           |
| Crystal system                                      | Monoclinic                                                                                                         | Triclinic                                                                                                         |
| Space group                                         | <i>P2/c</i>                                                                                                        | <i>P</i> -1                                                                                                       |
| Temperature                                         | 296(2) K                                                                                                           | 296(2) K                                                                                                          |
| <i>a</i> (Å)                                        | 25.6242(17)                                                                                                        | 12.8610(11)                                                                                                       |
| <i>b</i> (Å)                                        | 14.3236(9)                                                                                                         | 13.3752(11)                                                                                                       |
| <i>c</i> (Å)                                        | 25.0786(16)                                                                                                        | 27.481(2)                                                                                                         |
| <i>α</i> (deg)                                      | 90                                                                                                                 | 80.9320(10)                                                                                                       |
| <i>β</i> (deg)                                      | 103.0880(10)                                                                                                       | 80.0650(10)                                                                                                       |
| <i>γ</i> (deg)                                      | 90                                                                                                                 | 64.3310(10)                                                                                                       |
| <i>V</i> (Å <sup>3</sup> )                          | 8965.5(10)                                                                                                         | 4178.5(6)                                                                                                         |
| <i>Z</i>                                            | 4                                                                                                                  | 2                                                                                                                 |
| <i>D</i> <sub>calc.</sub> (g cm <sup>-3</sup> )     | 2.426                                                                                                              | 2.480                                                                                                             |
| <i>F</i> (000)                                      | 6442                                                                                                               | 3039                                                                                                              |
| <i>R</i> <sub>1</sub> [ <i>I</i> > 2σ( <i>I</i> )]  | 0.0394                                                                                                             | 0.0622                                                                                                            |
| <i>wR</i> <sub>2</sub> [ <i>I</i> > 2σ( <i>I</i> )] | 0.1036                                                                                                             | 0.2038                                                                                                            |
| <i>R</i> <sub>1</sub> (all data)                    | 0.044                                                                                                              | 0.0882                                                                                                            |
| <i>wR</i> <sub>2</sub> (all data)                   | 0.1079                                                                                                             | 0.2928                                                                                                            |
| GOOF                                                | 1.096                                                                                                              | 1.139                                                                                                             |

**Table S3.** Selected bond distances (Å) and angles (°) of **1a-1b**.

| <b>1a</b>   |           |             |          |
|-------------|-----------|-------------|----------|
| Nb(1)-O(1)  | 1.780(4)  | Nb(1)-O(14) | 2.095(4) |
| Nb(1)-O(17) | 2.089(4)  | Nb(1)-O(23) | 1.899(4) |
| Nb(1)-O(33) | 1.914(4)  | Nb(1)-O(37) | 2.443(4) |
| Nb(2)-O(2)  | 1.766(4)  | Nb(2)-O(21) | 1.947(4) |
| Nb(2)-O(22) | 1.971(4)  | Nb(2)-O(24) | 2.018(4) |
| Nb(2)-O(30) | 1.995(4)  | Nb(2)-O(39) | 2.428(4) |
| Nb(3)-O(3)  | 1.771(4)  | Nb(3)-O(13) | 2.116(4) |
| Nb(3)-O(17) | 2.081(4)  | Nb(3)-O(18) | 1.902(4) |
| Nb(3)-O(32) | 1.911(45) | Nb(3)-O(38) | 2.438(4) |
| Nb(4)-O(4)  | 1.743(4)  | Nb(4)-O(18) | 2.009(4) |
| Nb(4)-O(23) | 1.969(4)  | Nb(4)-O(31) | 2.018(4) |
| Nb(4)-O(36) | 1.988(4)  | Nb(4)-O(40) | 2.470(4) |
| Nb(5)-O(5)  | 1.745(4)  | Nb(5)-O(19) | 1.968(4) |
| Nb(5)-O(27) | 2.002(4)  | Nb(5)-O(33) | 2.037(4) |
| Nb(5)-O(35) | 1.974(4)  | Nb(5)-O(37) | 2.458(4) |

|                  |          |                  |            |
|------------------|----------|------------------|------------|
| Nb(6)-O(6)       | 1.773(4) | Nb(6)-O(19)      | 1.915(4)   |
| Nb(6)-O(20)      | 2.082(4) | Nb(6)-O(34)      | 2.085(4)   |
| Nb(6)-O(36)      | 1.914(4) | Nb(6)-O(40)      | 2.469(4)   |
| Nb(7)-O(7)       | 1.767(4) | Nb(7)-O(15)      | 2.095(4)   |
| Nb(7)-O(25)      | 1.906(4) | Nb(7)-O(29)      | 2.072(4)   |
| Nb(7)-O(30)      | 1.928(4) | Nb(7)-O(39)      | 2.457(4)   |
| Nb(8)-O(8)       | 1.764(4) | Nb(8)-O(14)      | 2.086(4)   |
| Nb(8)-O(16)      | 2.070(4) | Nb(8)-O(22)      | 1.908(4)   |
| Nb(8)-O(27)      | 1.921(4) | Nb(8)-O(37)      | 2.465(4)   |
| Nb(9)-O(9)       | 1.771(4) | Nb(9)-O(13)      | 2.071(4)   |
| Nb(9)-O(16)      | 2.075(4) | Nb(9)-O(21)      | 1.912(4)   |
| Nb(9)-O(28)      | 1.934(4) | Nb(9)-O(38)      | 2.435(4)   |
| Nb(10)-O(10)     | 1.761(4) | Nb(10)-O(20)     | 2.087(4)   |
| Nb(10)-O(26)     | 1.911(4) | Nb(10)-O(29)     | 2.080(4)   |
| Nb(10)-O(31)     | 1.934(4) | Nb(10)-O(40)     | 2.425(4)   |
| Nb(11)-O(11)     | 1.761(4) | Nb(11)-O(15)     | 2.085(4)   |
| Nb(11)-O(24)     | 1.931(4) | Nb(11)-O(34)     | 2.095(4)   |
| Nb(11)-O(35)     | 1.901(4) | Nb(11)-O(39)     | 2.424(4)   |
| Nb(12)-O(12)     | 1.762(5) | Nb(12)-O(25)     | 1.990(4)   |
| Nb(12)-O(26)     | 1.973(4) | Nb(12)-O(28)     | 2.004(4)   |
| Nb(12)-O(32)     | 1.997(5) | Nb(12)-O(38)     | 2.453(4)   |
| V(1)-O(37)       | 1.701(4) | V(1)-O(38)       | 1.701(4)   |
| V(1)-O(39)       | 1.713(4) | V(1)-O(40)       | 1.696(4)   |
| V(2)-O(15)       | 2.004(4) | V(2)-O(20)       | 2.000(4)   |
| V(2)-O(29)       | 1.915(4) | V(2)-O(34)       | 1.917(4)   |
| V(2)-O(41)       | 1.622(5) | V(3)-O(13)       | 1.993(4)   |
| V(3)-O(14)       | 1.988(4) | V(3)-O(16)       | 1.911(4)   |
| V(3)-O(17)       | 1.896(4) | V(3)-O(42)       | 1.622(4)   |
| Cu(1)-O(1)       | 2.350(5) | Cu(1)-N(1)       | 2.008(7)   |
| Cu(1)-N(2)       | 2.000(7) | Cu(1)-N(3)       | 2.007(7)   |
| Cu(1)-N(4)       | 1.993(8) | Cu(2)-N(5)       | 2.000(7)   |
| Cu(2)-N(6)       | 2.012(9) | Cu(2)-N(7)       | 2.003(8)   |
| Cu(2)-N(8)       | 2.003(7) | Cu(2)-O(45)      | 2.356(8)   |
| O(37)-V(1)-O(40) | 108.1(2) | O(37)-V(1)-O(38) | 110.6(2)   |
| O(40)-V(1)-O(38) | 108.9(2) | O(37)-V(1)-O(39) | 108.91(19) |
| O(40)-V(1)-O(39) | 110.9(2) | O(38)-V(1)-O(39) | 109.4(2)   |

---

**1b**

---

|             |          |             |          |
|-------------|----------|-------------|----------|
| Nb(1)-O(1)  | 1.799(7) | Nb(1)-O(20) | 1.882(7) |
| Nb(1)-O(26) | 2.112(7) | Nb(1)-O(31) | 2.131(7) |
| Nb(1)-O(32) | 1.858(7) | Nb(1)-O(37) | 2.397(7) |
| Nb(2)-O(2)  | 1.738(7) | Nb(2)-O(18) | 1.895(7) |
| Nb(2)-O(22) | 2.133(7) | Nb(2)-O(27) | 1.918(7) |
| Nb(2)-O(34) | 2.128(6) | Nb(2)-O(38) | 2.486(6) |
| Nb(3)-O(3)  | 1.754(7) | Nb(3)-O(14) | 1.895(7) |

|                  |           |                  |           |
|------------------|-----------|------------------|-----------|
| Nb(3)-O(22)      | 2.112(7)  | Nb(3)-O(24)      | 1.888(7)  |
| Nb(3)-O(35)      | 2.107(6)  | Nb(3)-O(38)      | 2.446(7)  |
| Nb(4)-O(4)       | 1.768(7)  | Nb(4)-O(21)      | 1.881(7)  |
| Nb(4)-O(23)      | 1.882(7)  | Nb(4)-O(33)      | 2.127(7)  |
| Nb(4)-O(35)      | 2.131(6)  | Nb(4)-O(39)      | 2.494(7)  |
| Nb(5)-O(5)       | 1.751(7)  | Nb(5)-O(25)      | 1.899(7)  |
| Nb(5)-O(29)      | 1.907(7)  | Nb(5)-O(33)      | 2.107(7)  |
| Nb(5)-O(34)      | 2.154(6)  | Nb(5)-O(39)      | 2.440(7)  |
| Nb(6)-O(6)       | 1.733(7)  | Nb(6)-O(14)      | 1.967(7)  |
| Nb(6)-O(16)      | 1.968(6)  | Nb(6)-O(18)      | 2.001(7)  |
| Nb(6)-O(32)      | 2.005(7)  | Nb(6)-O(38)      | 2.528(7)  |
| Nb(7)-O(7)       | 1.753(7)  | Nb(7)-O(13)      | 1.875(7)  |
| Nb(7)-O(19)      | 2.139(7)  | Nb(7)-O(30)      | 1.903(7)  |
| Nb(7)-O(31)      | 2.135(7)  | Nb(7)-O(37)      | 2.456(7)  |
| Nb(8)-O(8)       | 1.745(7)  | Nb(8)-O(15)      | 1.989(7)  |
| Nb(8)-O(17)      | 1.970(7)  | Nb(8)-O(23)      | 1.968(7)  |
| Nb(8)-O(24)      | 1.971(7)  | Nb(8)-O(40)      | 2.486(7)  |
| Nb(9)-O(9)       | 1.754(7)  | Nb(9)-O(15)      | 1.918(7)  |
| Nb(9)-O(16)      | 1.902(6)  | Nb(9)-O(26)      | 2.136(7)  |
| Nb(9)-O(36)      | 2.150(7)  | Nb(9)-O(40)      | 2.470(6)  |
| Nb(10)-O(10)     | 1.762(7)  | Nb(10)-O(13)     | 2.042(7)  |
| Nb(10)-O(20)     | 1.985(7)  | Nb(10)-O(27)     | 1.936(7)  |
| Nb(10)-O(29)     | 1.972(7)  | Nb(10)-O(37)     | 2.510(7)  |
| Nb(11)-O(11)     | 1.759(7)  | Nb(11)-O(17)     | 1.919(7)  |
| Nb(11)-O(19)     | 2.121(7)  | Nb(11)-O(28)     | 2.004(7)  |
| Nb(11)-O(36)     | 2.122(7)  | Nb(11)-O(40)     | 2.464(7)  |
| Nb(12)-O(12)     | 1.738(6)  | Nb(12)-O(21)     | 2.005(7)  |
| Nb(12)-O(25)     | 2.004(7)  | Nb(12)-O(28)     | 2.004(7)  |
| Nb(12)-O(30)     | 1.961(7)  | Nb(12)-O(39)     | 2.482(7)  |
| V(1)-O(37)       | 1.688(7)  | V(1)-O(38)       | 1.657(7)  |
| V(1)-O(39)       | 1.678(7)  | V(1)-O(40)       | 1.680(7)  |
| V(2)-O(19)       | 1.847(7)  | V(2)-O(26)       | 1.848(7)  |
| V(2)-O(31)       | 1.883(7)  | V(2)-O(36)       | 1.912(7)  |
| V(2)-O(41)       | 1.565(9)  | V(3)-O(22)       | 1.940(7)  |
| V(3)-O(33)       | 1.947(7)  | V(3)-O(34)       | 1.827(7)  |
| V(3)-O(35)       | 1.844(7)  | V(3)-O(42)       | 1.569(8)  |
| Cu(1)-O(1)       | 1.917(7)  | Cu(1)-N(1)       | 2.155(10) |
| Cu(1)-N(2)       | 1.966(12) | Cu(1)-N(3)       | 2.030(10) |
| Cu(1)-N(4)       | 1.968(12) | Cu(2)-O(2)       | 2.383(8)  |
| Cu(2)-N(5)       | 1.967(11) | Cu(2)-N(6)       | 1.990(11) |
| Cu(2)-N(7)       | 2.067(10) | Cu(2)-N(8)       | 2.040(10) |
| O(38)-V(1)-O(40) | 109.6(3)  | O(38)-V(1)-O(39) | 111.2(3)  |
| O(40)-V(1)-O(39) | 108.5(3)  | O(38)-V(1)-O(37) | 109.5(3)  |
| O(40)-V(1)-O(37) | 110.5(3)  | O(39)-V(1)-O(37) | 107.5(3)  |

---

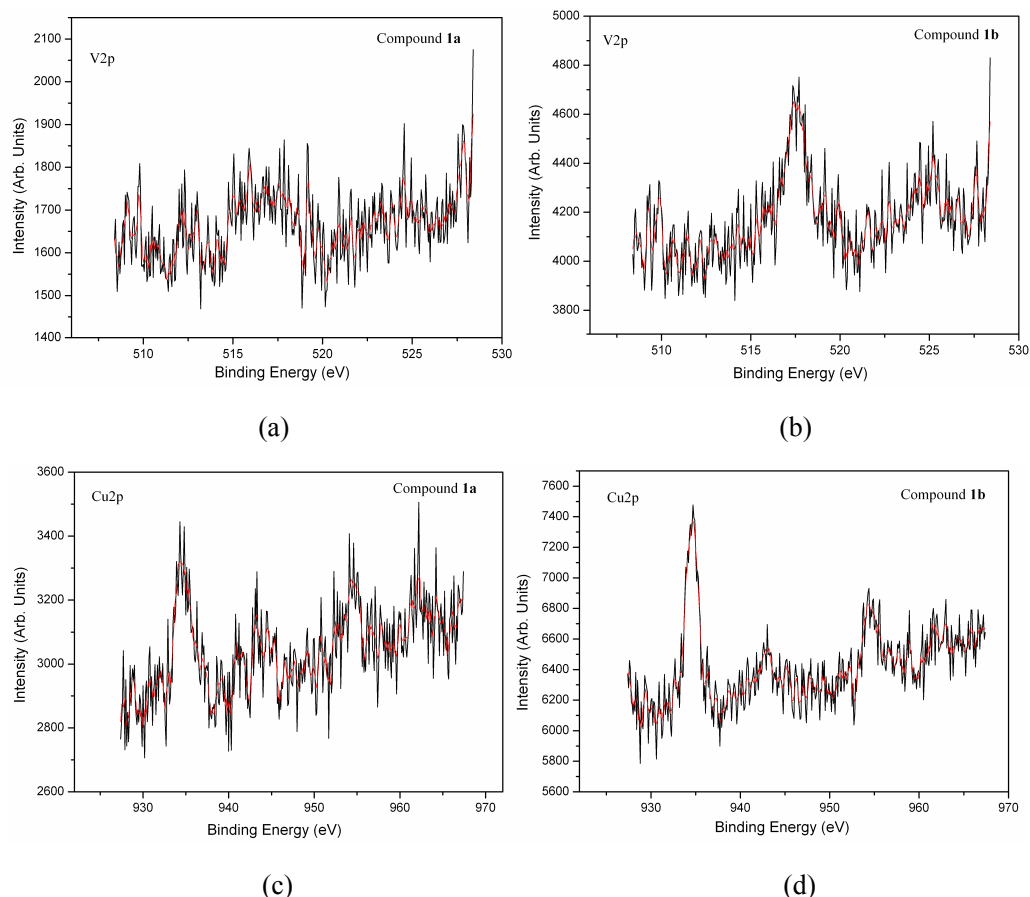

**Fig. S1.** (a) The XPS spectrum of **1a** gives two peaks at 517.8 and 515.9 eV, which should be attributed to  $V^{5+}2p_{3/2}$  and  $V^{4+}2p_{3/2}$ ,<sup>4-5</sup> respectively; (b) The XPS spectrum of **1b** gives one peak at 517.4 eV, as can be ascribed to  $V^{5+}2p_{3/2}$ ;<sup>5</sup> (c)/(d) The XPS spectra of **1a–1b** present two peaks: 934.3 and 954.3 eV for **1a**, 934.6 and 954.2 eV for **1b**, as can be ascribed to  $Cu2p_{3/2}$  and  $Cu2p_{1/2}$ ,<sup>6-7</sup> respectively.

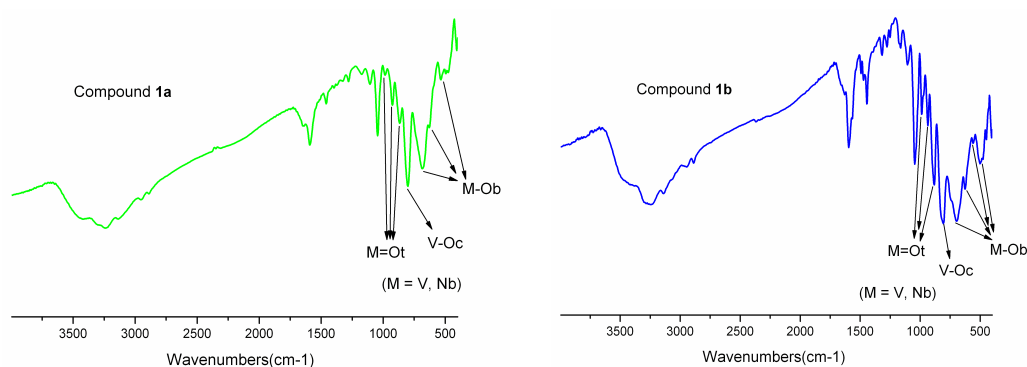

**Fig. S2.** The IR spectra of **1a** and **1b** display similar characteristic vibration patterns resulting from the bicapped Keggin structure in the region of  $400\text{--}1000\text{cm}^{-1}$ . There are three types of oxygen atoms:  $O_t$  ( $O_t$  = terminal oxygen atom, bonded to one V or Nb atom),  $O_b$  ( $O_b$  = bridging oxygen atom, bonded to two Nb atoms or bonded to one V atom and one Nb atom) and  $O_c$  ( $O_c$  = central oxygen atom, bonded to three Nb atoms and one V atom). The terminal  $M = O_t$  ( $M = V$ ,

Nb) vibrations appear at  $987$ ,  $925\text{cm}^{-1}$  and  $869\text{cm}^{-1}$  for **1a**, and at  $987$ ,  $933$  and  $881\text{cm}^{-1}$  for **1b**, respectively.<sup>8-10</sup> The characteristic peaks at  $686$ ,  $628$  and  $538\text{cm}^{-1}$  (**1a**) and at  $696$ ,  $624$ ,  $557$  and  $501\text{cm}^{-1}$  (**1b**) are attributed to the bridging  $\text{M-O}_b\text{-M}$  vibrations, respectively.<sup>9,10</sup> Bands at  $804\text{cm}^{-1}$  in **1a** and  $806\text{cm}^{-1}$  in **1b** are assigned to  $\text{V-O}_c$  vibration, respectively.<sup>11</sup> The characteristic absorption bands of organic groups occur at  $1045\text{--}1592\text{cm}^{-1}$  and  $1045\text{--}1596\text{cm}^{-1}$  for **1a** and **1b**, respectively. The broad band at around  $3245\text{cm}^{-1}$  (**1a**) and  $3243\text{cm}^{-1}$  (**1b**) is ascribed to the O-H vibrations from the water molecules.

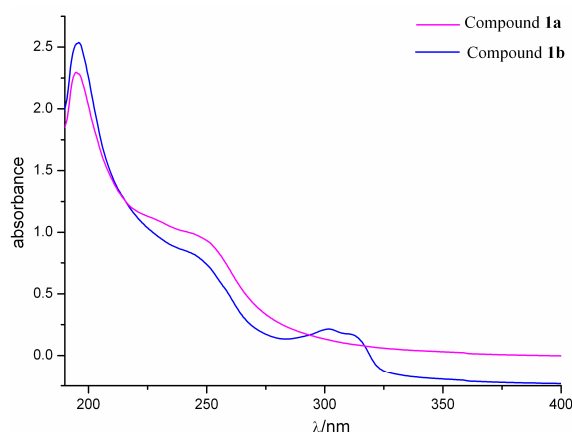

**Fig. S3.** The solubility of compounds **1a** and **1b** is usually very poor in water and organic solvents. Compounds **1a–1b** were placed in water heated at  $60^\circ\text{C}$  for 1 h, then slowly cooled to room temperature. The UV spectra of **1a–1b** were measured in aqueous solution. There are two characteristic absorption peaks appears at 195, 249nm in **1a**, which can be assigned to  $\text{O}\rightarrow\text{M}$  ( $\text{M} = \text{Nb}, \text{V}$ ) charge transfer transitions.<sup>12,13</sup> There are four characteristic absorption bands occur at 196, 245, 302, 311nm in **1b**. The higher energy bands 196, 245nm in **1b** are associated with  $\text{O}\rightarrow\text{M}$  ( $\text{M} = \text{Nb}, \text{V}$ ) charge transfer transitions,<sup>12,13</sup> whereas the lower energy band at 302 and 311nm in **1b** are ascribed to the ligand (2,2'-bipy)-to-metal ( $\text{Cu}^{\text{II}}$ ) charge-transfer (LMCT) transitions.<sup>13</sup>

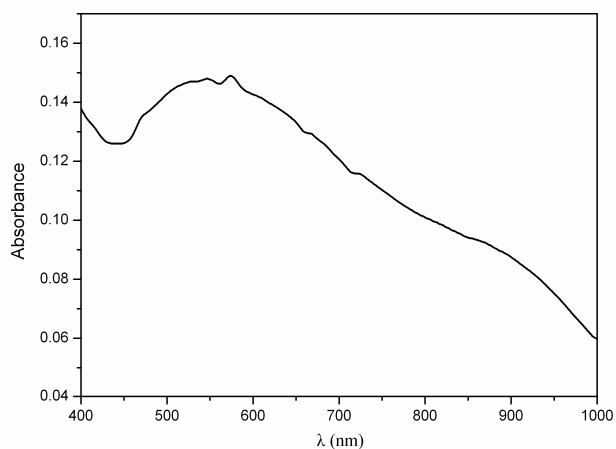

**Fig. S4.** Visible absorption spectrum of **1a** in solid form showing the broad bands from 460 to 1000nm, which should be attributed to the d-d transitions and intervalence charge transfer (IVCT,  $\text{V}^{4+}\rightarrow\text{V}^{5+}$ ) transitions.<sup>14</sup>

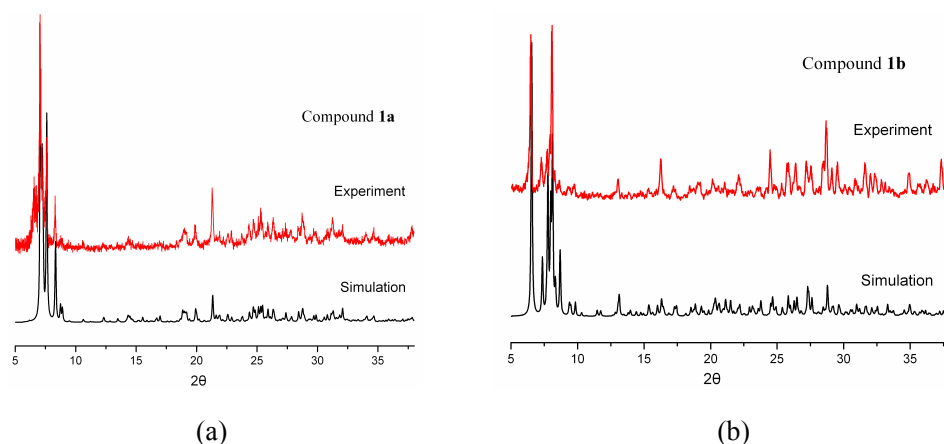

**Fig. S5.** (a)/(b) The experimental (red) and simulated (black) PXRD patterns for compounds **1a–1b**, respectively. The prominent diffraction peaks of experimental patterns match well with the simulated patterns from the single-crystal data in corresponding positions, indicating that the crystal phase purity of compounds **1a–1b**. In addition, the differences in reflection intensities may be due to the variation in preferred orientation of the powder samples.

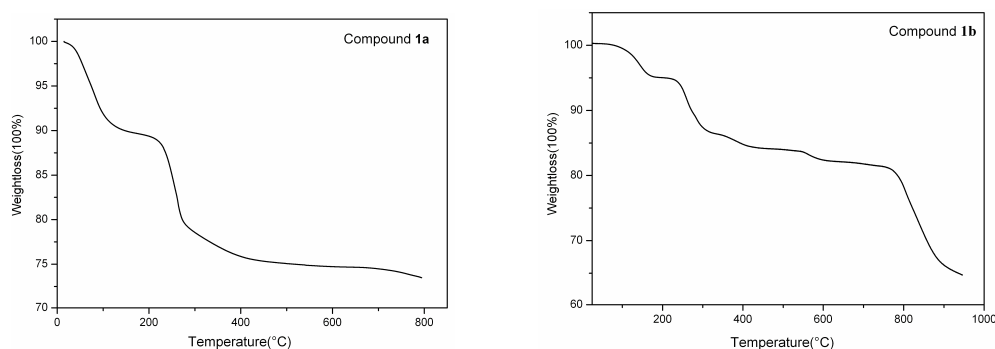

**Fig. S6.** Thermogravimetric analysis (TGA) studies of **1a–1b** were performed under  $N_2$  at a  $10^\circ C/min$  rate. Two continuous weight losses steps were observed on the TGA curve of **1a**. The first weight loss of 10.05% (calcd. 9.89%) in the range  $25–150^\circ C$  is attributed to the removal of 17 lattice water molecules and one coordinated water molecule. And the second weight loss of 15.47% (calcd. 15.57%) from 150 to  $700^\circ C$  comes from the release of 8.5 en ligands. The remaining 2.5 en ligands and the framework of compound **1a** begins to decompose when the temperature exceeds  $700^\circ C$ . Compound **1b** undergoes three weight loss stages. The first weight loss of 4.94% (calcd. 5.17 %) in the range  $25–90^\circ C$  is ascribed to the removal of seven lattice water molecules and two coordinated water molecules. The second weight loss of 12.84% (calcd. 13.37%) from 190 to  $620^\circ C$  results from the release of seven en ligands. Followed by a weight of 11.18% (calcd. 9.97%) in the temperature range  $620–850^\circ C$  corresponds to the decomposition of two 2,2'-bipy. Then, the framework of compound **1b** starts to decompose at  $850^\circ C$ .

## References

- 1 M. Filowitz, R. K. C. Ho, W. G. Klemperer and W. Shum. *Inorg. Chem.*, 1979, **18**, 93.
- 2 G. M. Sheldrick, SHELXL 97, *Program for the Refinement of Crystal Structure*, University of Göttingen, Germany, 1997.

- 3 G.M. Sheldrick, SHELXL 97, *Program for Crystal Structure Refinement*, University of Göttingen, Göttingen, Germany, 1997.
- 4 Y. B. Liu, J.H. Yu, J. Liu, Y. K. Lu, J. Q. Xu and T. G. Wang, *J. Mol. Struct.*, 2007, **833**, 58.
- 5 X. S. Zang, H. Q. Tan, Q. Wu, Y. Li, Y.G. Li and E. B. Wang, *Inorg. Chem. Commun.*, 2010, **13**, 471.
- 6 K. Yu, Y. G. Li, B. B. Zhou, Z. H. Su, Z. F. Zhao and Y. N. Zhang, *Eur. J. Inorg. Chem.*, 2007, 5662.
- 7 S. Z. Li, J. W. Zhao, P. T. Ma, J. Du, J. Y. Niu and J. P. Wang, *Inorg. Chem.*, 2009, **48**, 9819.
- 8 T. H. Hu, Q. Wang, W. S. You, D. W. Song, C. Y. Huang, Y. Xu and Z. G. Sun, *Inorg. Chem. Commun.*, 2008, **11**, 470.
- 9 L. R. Zhang, Z. Shi, G. Y. Yang, X. M. Chen and S. H. Feng, *J. Chem. Soc., Dalton Trans.*, 2000, 275.
- 10 R. P. Bontchev and M. Nyman, *Angew. Chem. Int. Ed.*, 2006, **45**, 6670.
- 11 M. I. Khan, S. Cevik and R. Hayashi, *J. Chem. Soc., Dalton Trans.* 1999, 1651.
- 12 L. Chen, F. L. Jiang, Z. Z. Lin, Y. F. Zhou, C. Y. Yue and M. C. Hong, *J. Am. Chem. Soc.*, 2005, **127**, 8588.
- 13 J. Y. Niu, G. Chen, J. W. Zhao, P. T. Ma, S. Z. Li, J. P. Wang, M. X. Li, Y. Bai and B. S. Ji, *Chem. Eur. J.*, 2010, **16**, 7082.
- 14 A. Müller, J. Meyer, H. Bögge, A. Stammler and A. Botar, *Chem. Eur. J.*, 1998, **4**, 1388.
